# Supplementary material for: Systematic identification of post-transcriptional regulatory modules
Source: PubMed Central journal article supplement (PMC11385195; doi:10.1038/s41467-024-52215-7), 2024-09-09
Supplement: 41467_2024_52215_MOESM1_ESM.pdf [file 41467_2024_52215_MOESM1_ESM.pdf]

**The PDF file includes:**

- Figure S1. Multi-modal integration of RBP interaction data
- Figure S2. RBPs interaction heatmap inferred from individual data modalities
- Figure S3. RBPs integrated distances assessment
- Figure S4. The identified RBPs interactions correspond to common functionalities
- Figure S5. Estimating cell transcriptional response to RBP depletion with Perturb-seq
- Figure S6. BioID2-mediated proximity protein labeling
- Figure S7. TAF15 and ZC3H11A regulate alternative splicing
- Figure S8. TAF15 controls mRNA translation and stability
- Figure S9. ZNF800 and QKI control gene expression at transcriptional and post-transcriptional level

**Other Supplementary Material for this manuscript includes the following:**

- Data file S1 (tsv format). Integrated Regulatory Interaction Map: pairwise distances between RNA binding proteins
- Data file S2 (tsv format). The pairwise distances between RBPs inferred from STRING-DB
- Data file S3 (tsv format). The pairwise distances between RBPs inferred from BioID2 data
- Data file S4 (tsv format). The pairwise distances between RBPs inferred from eCLIP data
- Data file S5 (tsv format). The pairwise distances between RBPs inferred from Perturb-seq data
- Data file S6 (tsv format). BioID2 Proximity Interactome: log fold changes
- Data file S7 (tsv format). BioID2 Proximity Interactome: P-values
- Data file S8 (tsv format). eCLIP RBP-RNA binding profiles
- Data file S9 (tsv format). Pathway enrichment for RNA binding proteins inferred from BioID2 data: GSEA results for GO Biological Process annotations
- Data file S10 (tsv format). Pathway enrichment for RNA binding proteins inferred from BioID2 data: GSEA results for GO Molecular Function annotations
- Data file S11 (tsv format). Pathway enrichment for RNA binding proteins inferred from BioID2 data: GSEA results for GO Cellular Component annotations
- Data file S12 (tsv format). Data availability for the studied RNA binding proteins
- Data file S13 (tsv format). RBP-centered regulatory modules annotation.
- Data file S14 (tsv format). Comparison to the external PPI databases STRING, OpenCell and hu.MAP
- Data file S15 (tsv format). Compositions of RNA regulons for the RBP-centered regulatory modules.

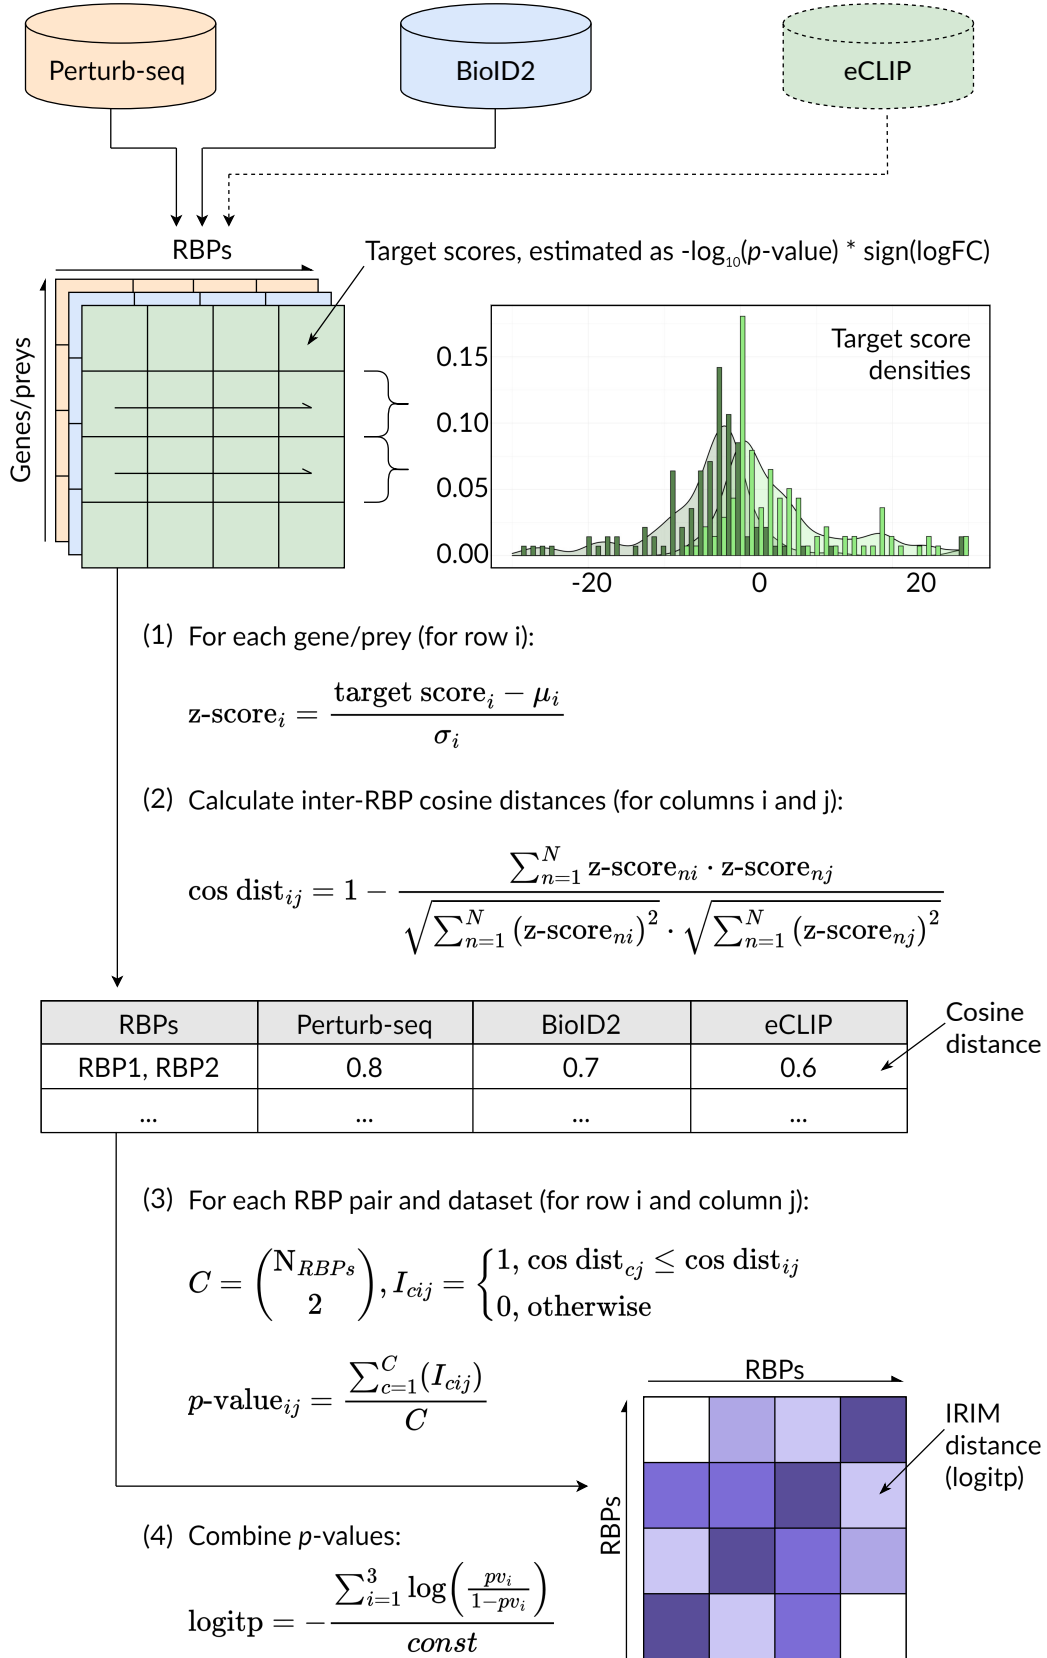

### **Figure S1. Multi-modal integration of RBP interaction data**

Top: the three data modalities are shown on top; the datasets generated in this paper are highlighted with solid line, and the data downloaded from publicly available resources is highlighted with dashed line.

Middle: each dataset was preprocessed into a table, where the columns are RBPs and the rows are gene targets (shown in color for individual datasets). Every RBP was represented by a numeric column vector. The gene targets correspond to: for Perturb-Seq - individual genes, for Biold2 - protein binding partners, for eCLIP - mRNA binding targets. Difference between two numeric row vectors is shown on the right in the form of a histogram.

Bottom: the formulas applied at the key steps of the integration procedure are shown. (1): numeric column vectors were normalized by applying z-score transformation. (2): For each dataset, the cosine distances between pairs of individual RBPs were calculated. (3): The resulting distances were then transformed into empirical p-values reflecting assay-specific inter-RBPs distances. (4): Finally, a single interaction score was measured for each RBP pair by combining the p-values from the three assays using logit aggregation.

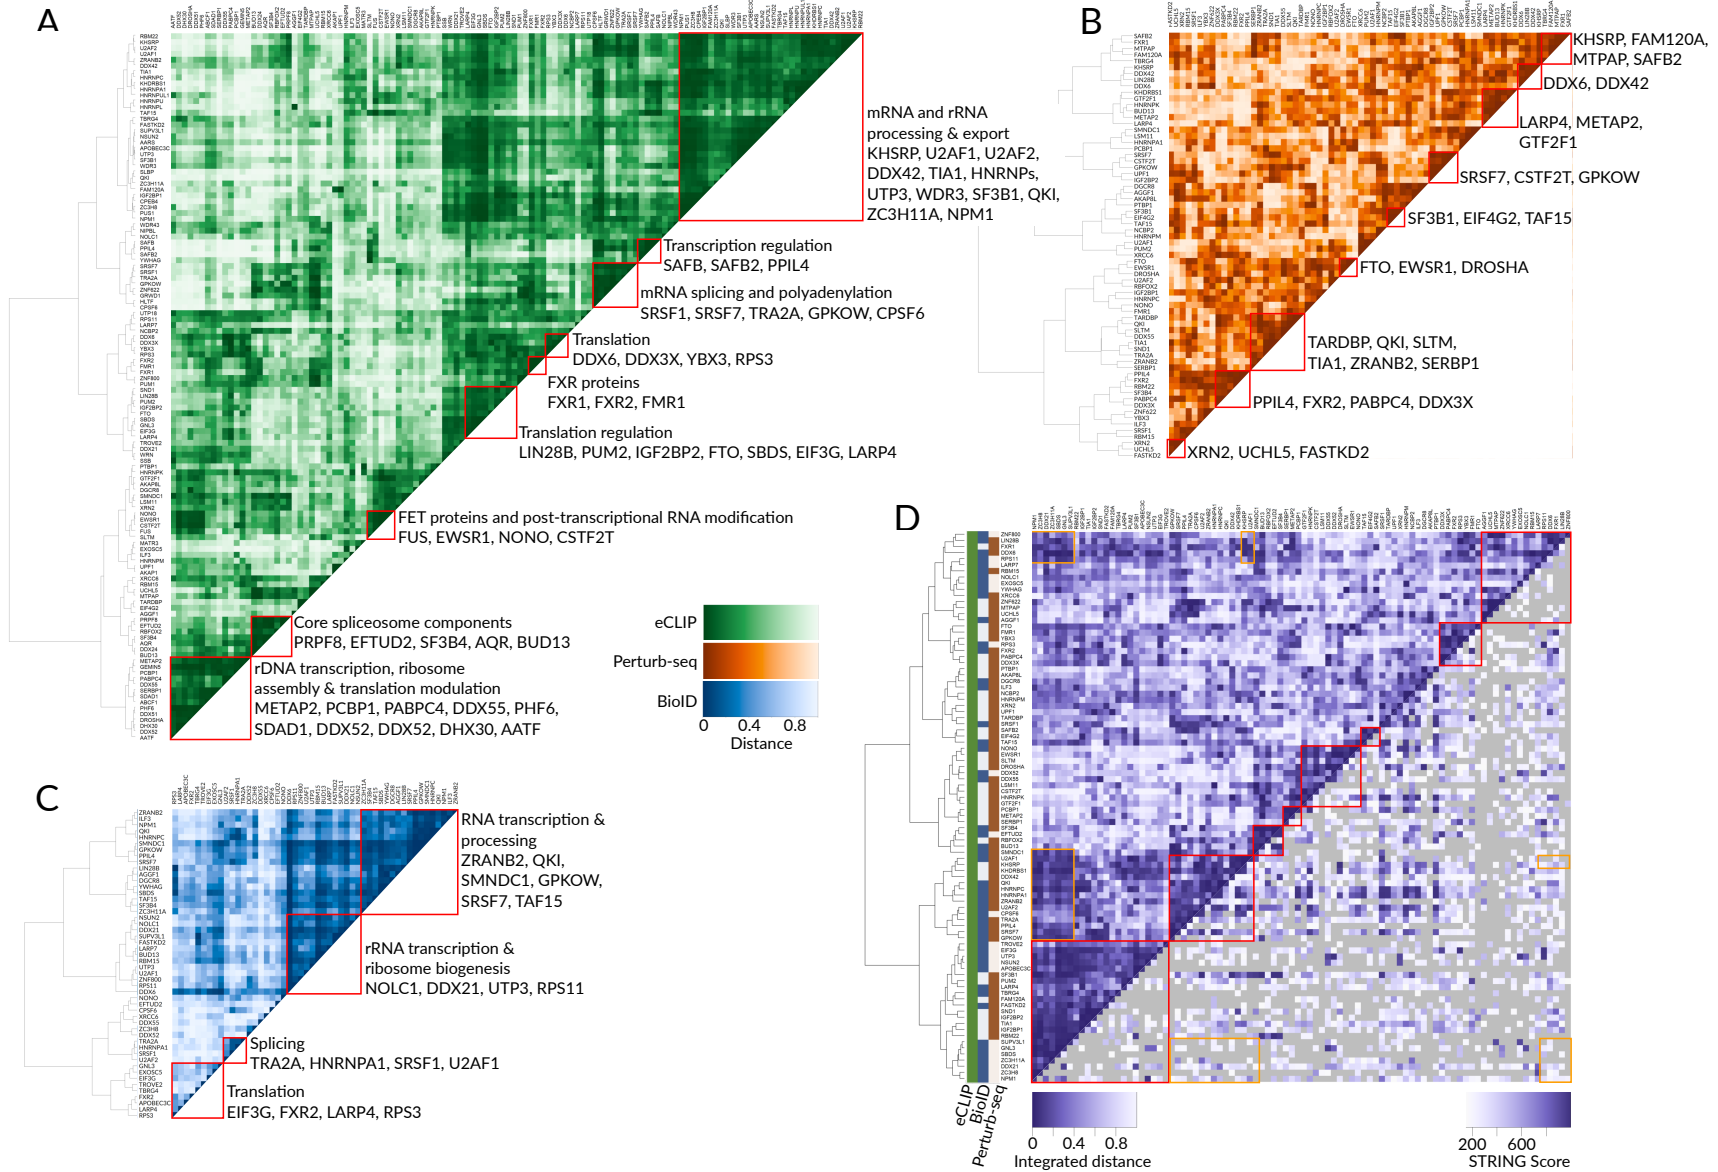

**Figure S2. RBPs interaction heatmap inferred from individual data modalities**

**(A)** A heatmap showing the pairwise distances between RBPs as informed by eCLIP data. Each row and column represents a given RBP; the hierarchical clustering dendrogram of RBPs is shown on the left. Known regulatory modules, consisting of previously annotated functional interactions, are marked with red borders and labeled.

**(B)** A heatmap showing the pairwise distances between RBPs based on the Perturb-seq data. Annotations as in (A).

**(C)** A heatmap showing the pairwise distances between RBPs based on the Biold2 dataset. Annotations as in (A).

**(D)** Upper triangle: the heatmap of IRIM as in Fig. 2A. Lower triangle: the heatmap showing the STRING interaction confidence scores (multiplied by 1000) between RBPs<sup>1</sup>. The location of RBPs within the heatmap is a symmetrical reflection of the upper triangle. The pairs of RBPs where the interaction score could not be calculated are shown in gray. The same regulatory modules as in Fig. 2A are highlighted in red and yellow.

Data used to generate this Figure are available in the Source Data File.

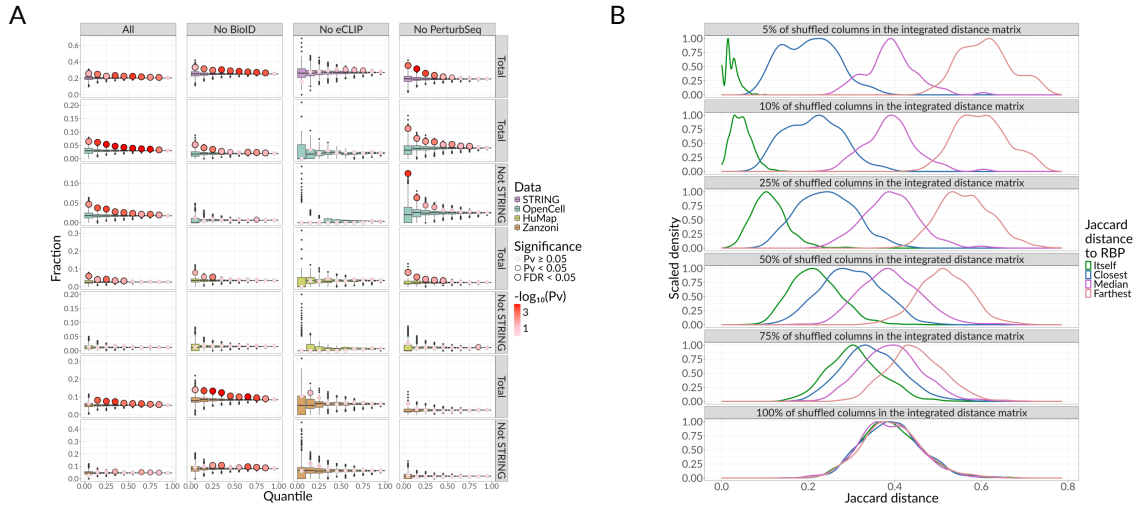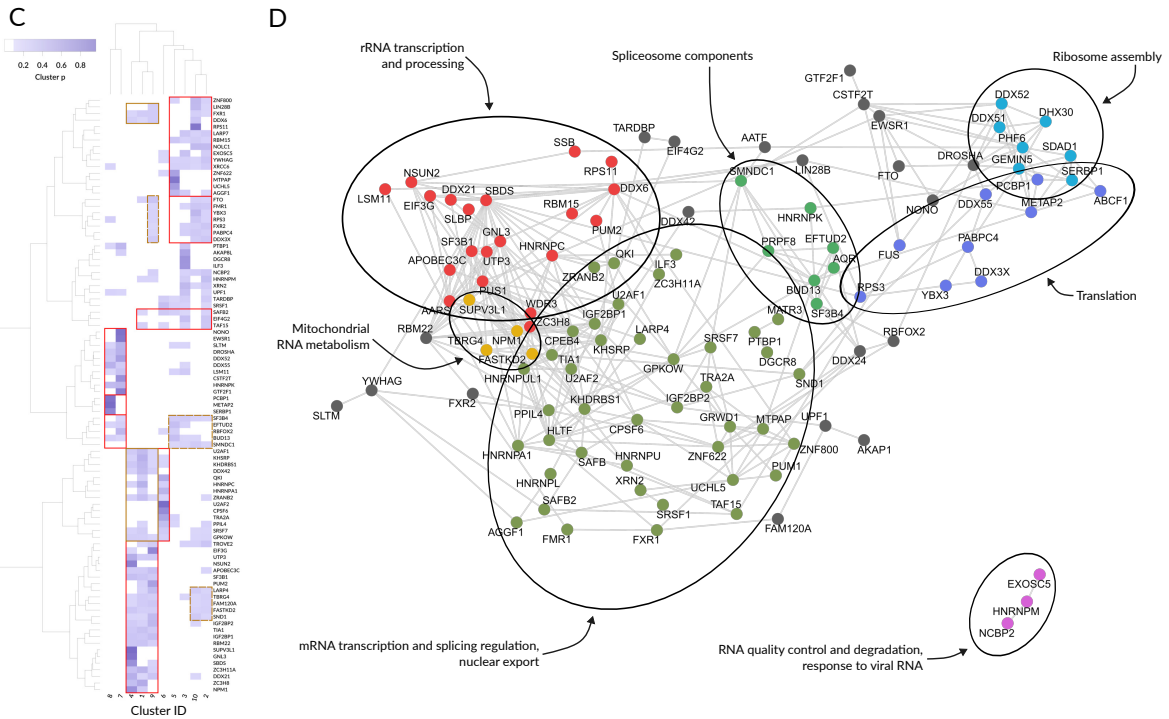

### Figure S3. RBPs integrated distances assessment

**(A)** Boxplots and dots representing fractions of the interactions confirmed by the external databases among the RBP pairs with the inter-RBP distance lower than the certain quantile. Boxplots:  $10^4$  random shuffles of the IRIM; dots: the real data. The distances, left-to-right: the integrated distances from Fig. 2A, the distances from eCLIP and Perturb-seq integration, BioID and Perturb-seq integration, and BioID and eCLIP integration (see Methods). The external databases, top-to-bottom: STRING, OpenCell, OpenCell w/o STRING support, hu.MAP, hu.MAP w/o STRING support, Zanzoni et al., Zanzoni w/o STRING support. Color fill denotes the external database used to calculate the fraction, size and line color denote the right-tailed empirical p-value calculated from  $10^4$  shuffling iterations (as in Fig. 2F) and FDR-corrected for the number of tested quantiles. Box plot bounds and center represent the first, second and third quartiles, while whiskers represent minimum and maximum values in the data excluding outliers which are more than 1.5 interquartile range from lower and upper quartiles and are depicted as dots.

**(B)** Density plots illustrating the consistency of IRIM. The distributions of the cosine distances shown in the figure were obtained by shuffling 5%, 10%, 25%, 50%, 75% or 100% of the columns in the pairwise integrated distance matrix (10 shuffles, see Methods). Each time we calculated the cosine distance as the 'distance between distance vectors' for the original RBP's distance vector and (1) its modified version from the shuffled matrix (i.e. distance to the original self), (2) the distance vectors to other RBPs (defining closest, median, and the farthest cosine distances). Considering 90 initial RBPs, the procedure resulted in  $90 \times 10 = 900$  estimates for each group and shuffling percent.

**(C)** Fuzzy clustering of IRIM. Rows represent RBPs, columns represent clusters. The functionally pleiotropic groups of RBPs are highlighted in yellow. RBP groups from Fig. 2A are highlighted with solid frames, other groups are highlighted with dashed frames. For the clustering, we used the c-means algorithm with the degree of fuzzification set to 1.25, 10 clusters, and Manhattan distance.

**(D)** Vertices represent individual RBPs; edges depict the pairs of RBPs with an integrated distance less than 0.05. The communities of RBPs, related to different groups of RNA processes, are colored and highlighted, similar to Fig. 2.

Data used to generate this Figure are available in the Source Data File.

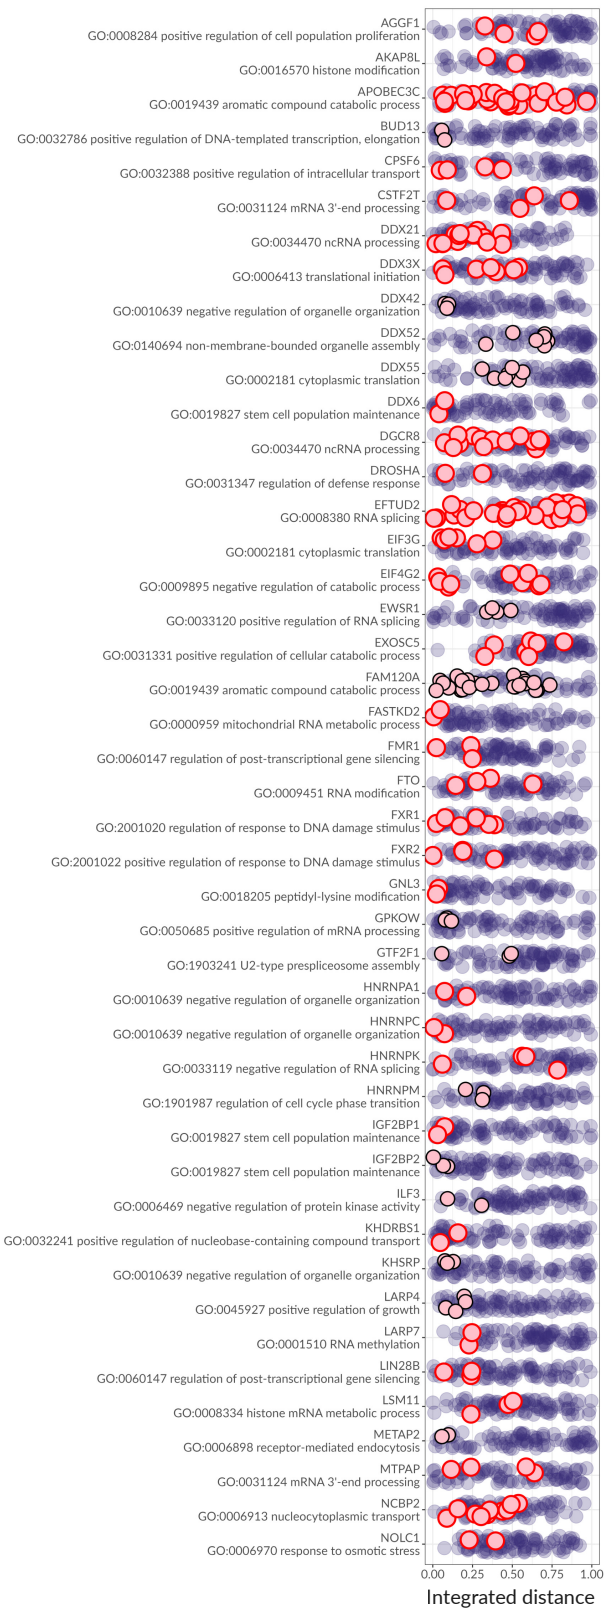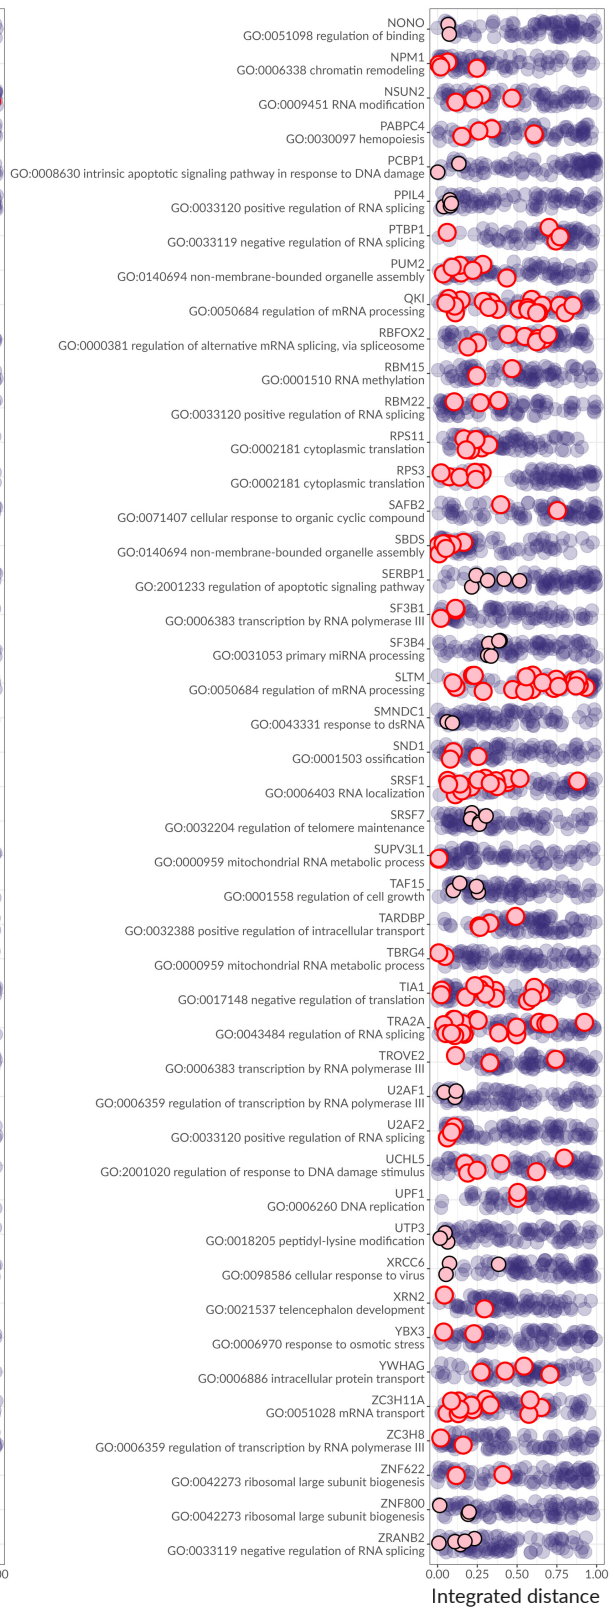



**Figure S4. The identified RBPs interactions correspond to common functionalities**

Swarm Plots for RBP Partners of the 90 RBPs. Each swarm plot represents the ordering of neighboring RBPs for a query RBP. Each point represents an individual RBP. The points are organized by the integrated distance from the specified RBP to the query RBP. Points highlighted in red share the query GO term annotation. The red-circled red dots are a part of the GO term that also includes the query RBP (63 out of 87 RBPs annotated in GO, 72%, 3 RBPs are unannotated); the black-circled red dots represent the GO terms that do not include the query RBP (28% of the annotated RBPs). The query RBP and the query GO term are shown on the left. The common functions of RBPs with their closest neighbors were tested by considering the GO terms that are enriched (NES score  $< -0.5$ , focusing on lower distance values) among the close neighbors of each query RBP. These terms were then intersected with the GO terms containing the query protein.

Data used to generate this Figure are available in the Source Data File.

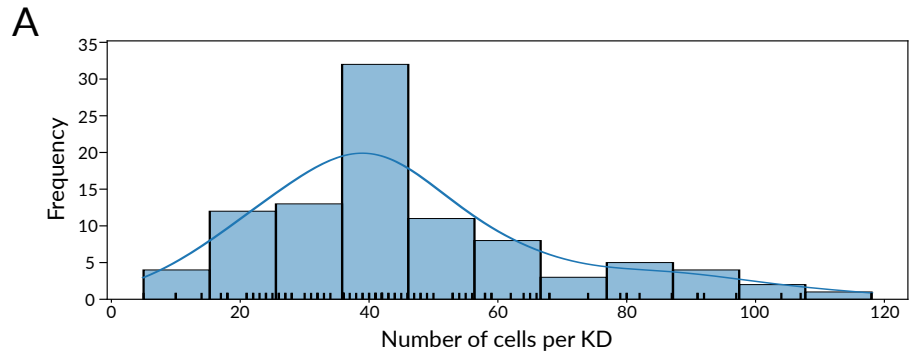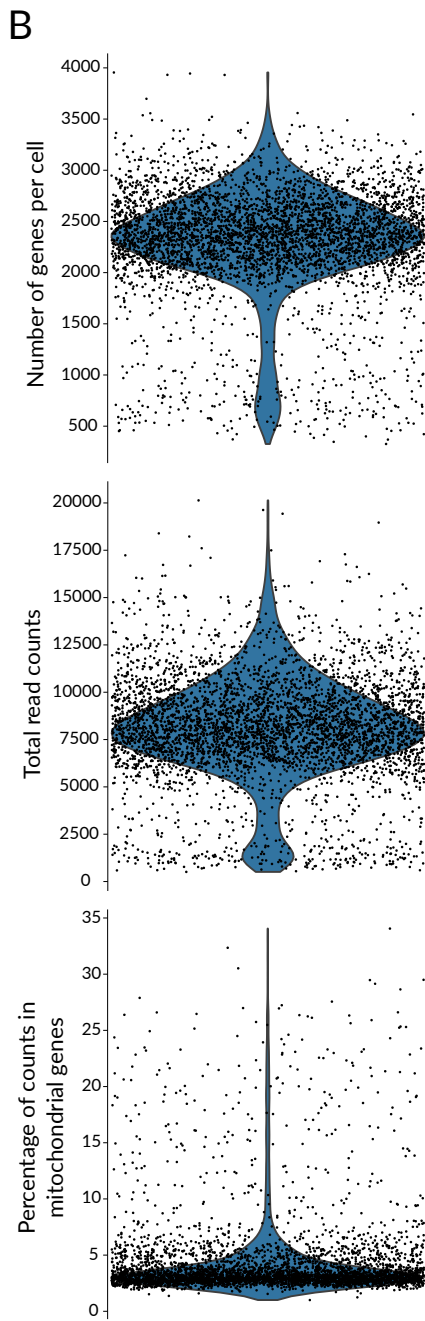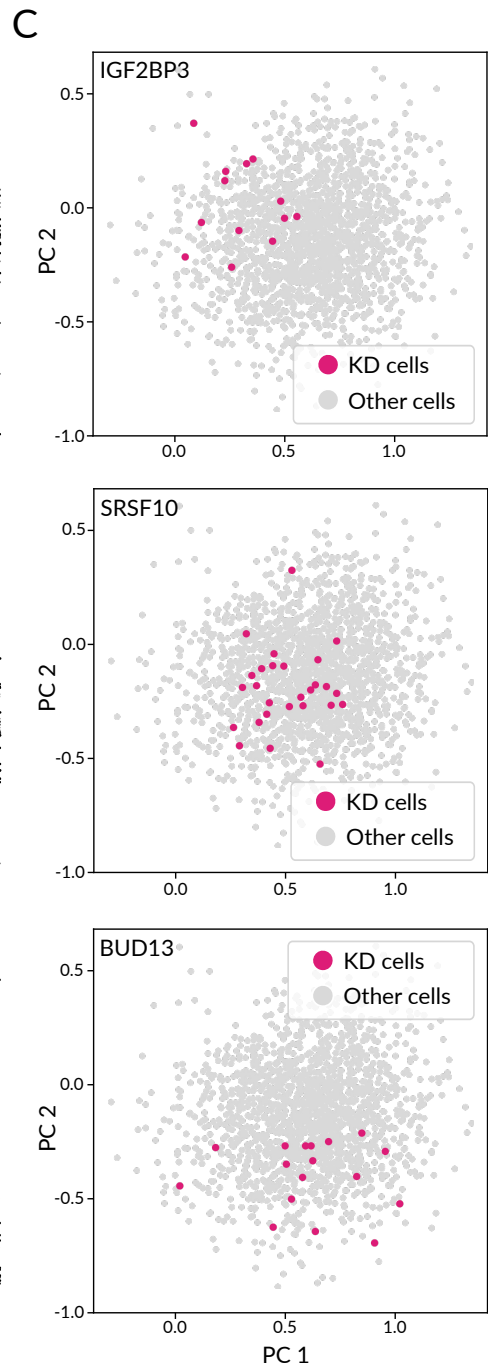

**Figure S5. Estimating cell transcriptional response to RBP depletion with Perturb-seq**

**(A)** A histogram and a Kernel Distribution Estimation Plot showing the number of single cell transcriptomes sequenced for each individual RBP knockdown for the Perturb-seq dataset.

**(B)** Violin plots showing the number of genes sequenced, number of total reads, and percentage of reads mapping to mitochondrial genes for the single cell transcriptomes sequenced. The cells whose corresponding sgRNA was successfully identified are shown.

**(C)** PCA projections of the single cell transcriptomes. The cells carrying knock downs of a target RBP are highlighted in red. The knockdown cells are highlighted for example proteins IGF2BP3 (top), SRSF10 (middle) and BUD13 (bottom).

Data used to generate this Figure are available in the Source Data File.

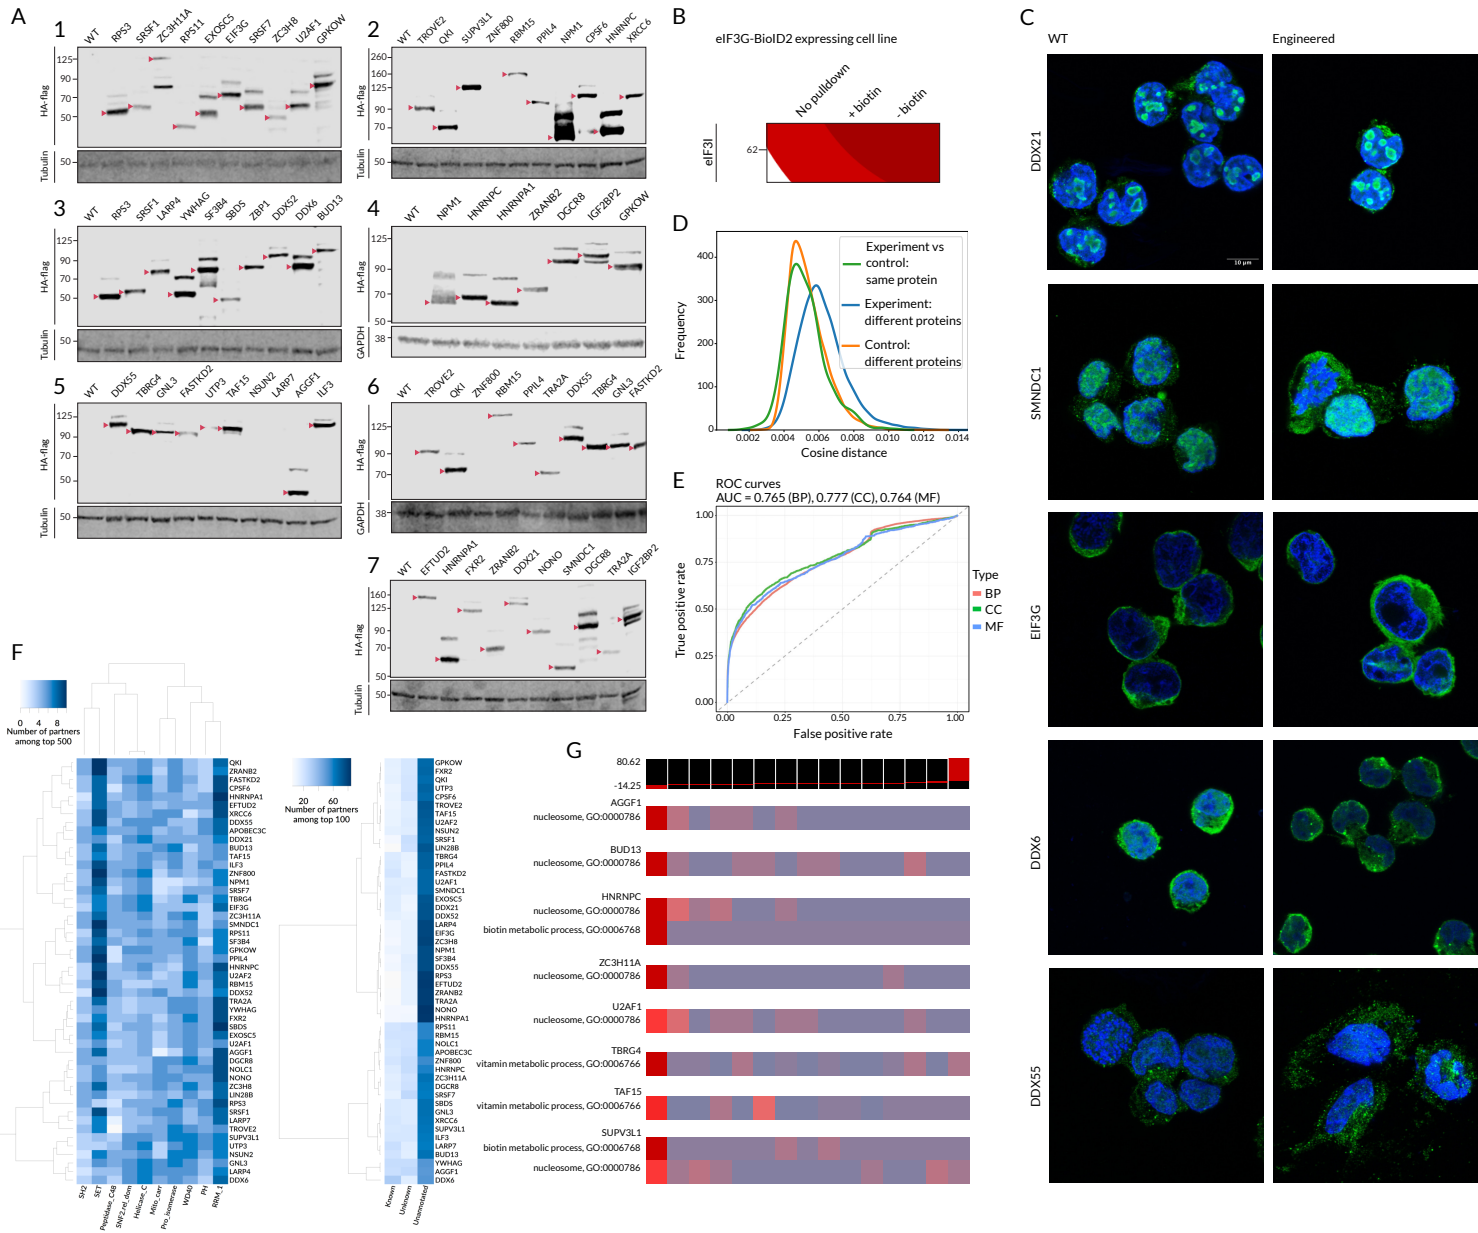

## Figure S6. BioID2-mediated proximity protein labeling

**(A)** Western blot analysis of cell lysates collected from each of 50 RBP-BioID2-expressing cell lines. HA antibody along with either tubulin or GAPDH antibodies for endogenous controls were used. Full blots are shown, the lanes are labeled by the fusion protein expressed; the bands corresponding to the correct protein sizes are highlighted by red arrows. Notably, the presence of multiple bands in Western blots is expected due to recognized post-translational modifications and self-biotinylation of RBPs (<sup>2</sup>, Suppl. Fig. 1A).

**(B)** Western blot analysis of eIF3I in the lysate collected from eIF3G-BioID2-expressing cell line. Input lysate, streptavidin pulldown sample, and negative control pulldown (without the addition of biotin) are shown.

**(C)** Representative images of immunofluorescence assay results obtained for 5 RBPs WT (left) or fused with BioID2 (right). Blue corresponds to DAPI, green corresponds to RBP antibodies staining.

**(D)** Kernel Distribution Estimation Plot of pairwise cosine distances between proteomic profiles of all the individual samples. The pairwise distances were grouped into categories based on two features: (1) if the samples are “experiments” (+ biotin) or “control” (- biotin), (2) if the samples come from the same cell line or two different cell lines. The distributions of pairwise distances within 3 representative categories are shown in color.

**(E)** The ROC curves for predictors of gene ontology (GO) annotations from RBP protein neighborhoods. BioID2-based proximity labeling data was used to predict GO annotations of RBPs as described in Methods. Then, the known GO annotations assigned to a given RBP were used to estimate the specificity and sensitivity of the classifier. The curves corresponding to 3 types of GO annotations are shown in color: BP, MF, and CC represent Biological Process, Molecular Function, and Cellular Component groups of GO, respectively.

**(F)** Left: heatmap showing the number of proteins representing the most widely present Pfam families among the top 500 neighboring proteins for each query RBP. Right: heatmap showing the fractions of canonical RBPs (those with RNA binding domains), non-canonical RBPs (those with no RNA binding domains that still bind RNA) and unannotated proteins among the top 100 neighboring proteins for each query RBP.

**(G)** Examples of GO terms significantly depleted in the proximity labeling profiles, as reported by iPAGE. Log fold change values were calculated for biotin-positive versus negative samples. These differences are partitioned into 15 discrete proximity bins. Bins to the left contain proteins that are abundantly found in the negative samples, whereas the ones to the right contain proteins found in biotin-positive samples. In the heat map representation, rows correspond to pathways and columns to consecutive proximity bins. Red entries indicate the enrichment of pathway genes in a given proximity bin. Enrichment and depletion are measured using hypergeometric p-values (log-transformed).

Data used to generate this Figure are available in the Source Data File.

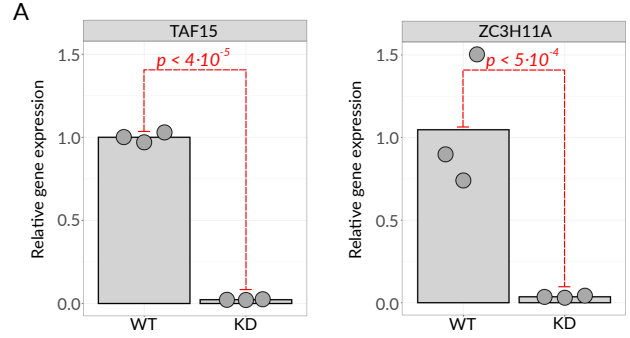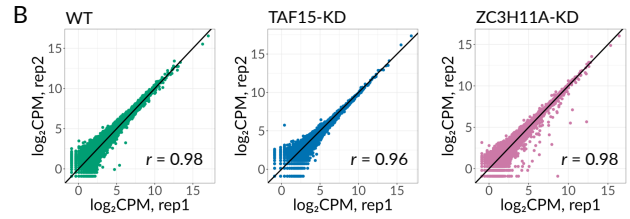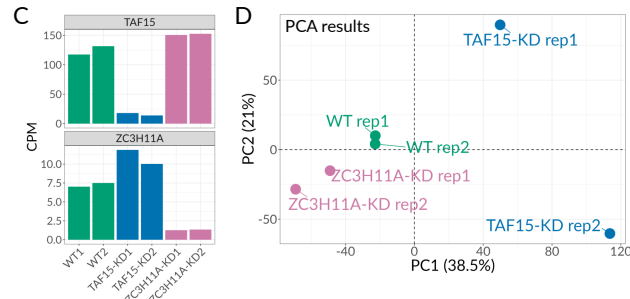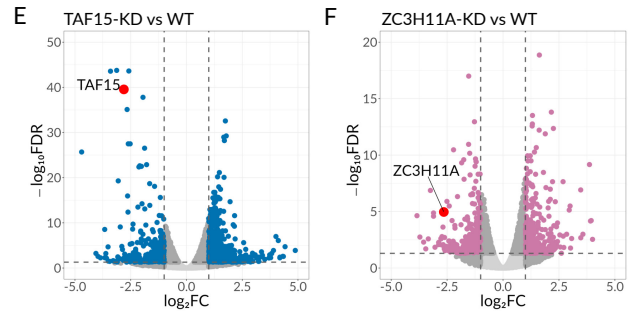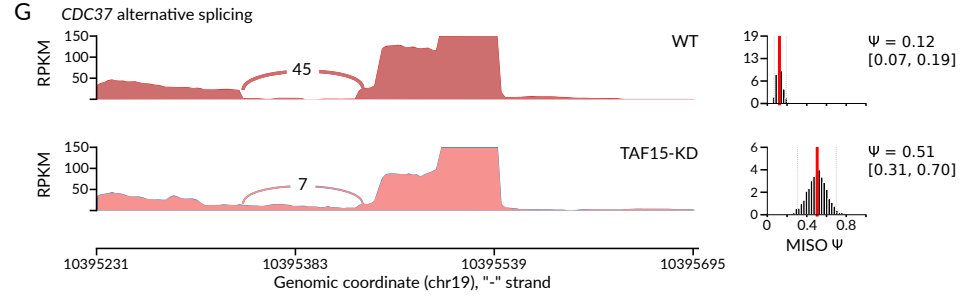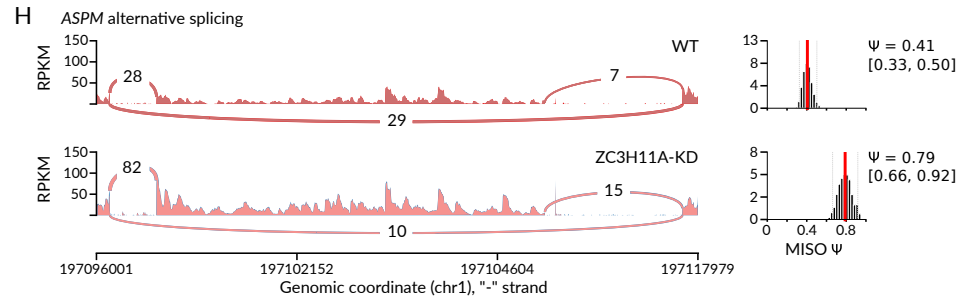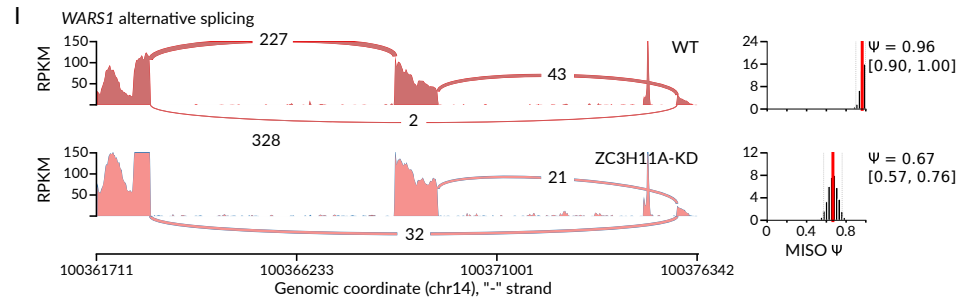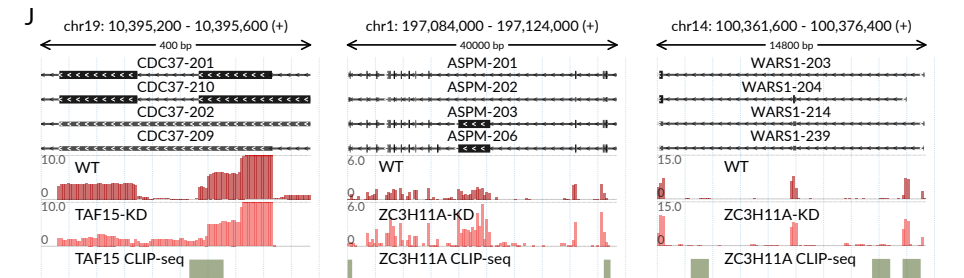

### Figure S7. TAF15 and ZC3H11A regulate alternative splicing

(A) RT-qPCR quantification of relative levels of *TAF15* and *ZC3H11A* transcripts in the respective knockdown cell lines. *P* from one-sided t-test performed on log-transformed expression estimates,  $3.764 \times 10^{-5}$  for TAF15-KD and  $4.88 \times 10^{-4}$  for ZC3H11A-KD.

(B) Scatter plots showing the correlations between biological replicates log2CPM for RNA-seq experiments.

(C) Relative expression (in CPM) of *TAF15* and *ZC3H11A* in the RNA-seq samples of WT and knockdown cell lines.

(D) PCA analysis of RNA-seq samples for WT, TAF15-KD and ZC3H11A-KD cells. The first two principal components are shown. Analysis was performed using log2CPM values.

(E) Volcano plot showing the changes in gene expression upon TAF15 knockdown. *TAF15* is highlighted in red. The vertical dashed lines show log2FC thresholds of -1 and 1. The horizontal dashed line corresponds to FDR of 0.05. In total, there are 930 genes passing  $|\log_2FC| > 1$  and  $FDR < 0.05$  (highlighted in blue)

(F) Volcano plot showing the changes in gene expression upon ZC3H11A knockdown with 565 genes passing  $|\log_2FC| > 1$  and  $FDR < 0.05$  filters (highlighted in pink). The filters are shown as in (D). *ZC3H11A* is highlighted in red.

(G) Sashimi plot illustrating the changes in intron retention event usage in *CDC37* transcript upon TAF15 knockdown.

(H) Sashimi plot illustrating the changes in skipped exon usage in *ASPM* transcript upon ZC3H11A knockdown.

(I) Sashimi plot illustrating the changes in skipped exon usage in *WARS1* transcript upon ZC3H11A knockdown.

(J) Genomic views of the *CDC37* retained intron (left), *ASPM* skipped exon (middle), and *WARS1* skipped exon (right). Below, the RNA-seq profiles from WT, TAF15-KD and ZC3H11A-KD cells are shown. Y axis: counts per million (CPM). TAF15 and ZC3H11A CLIP-seq peaks are shown at the bottom.

Data used to generate this Figure are available in the Source Data File.

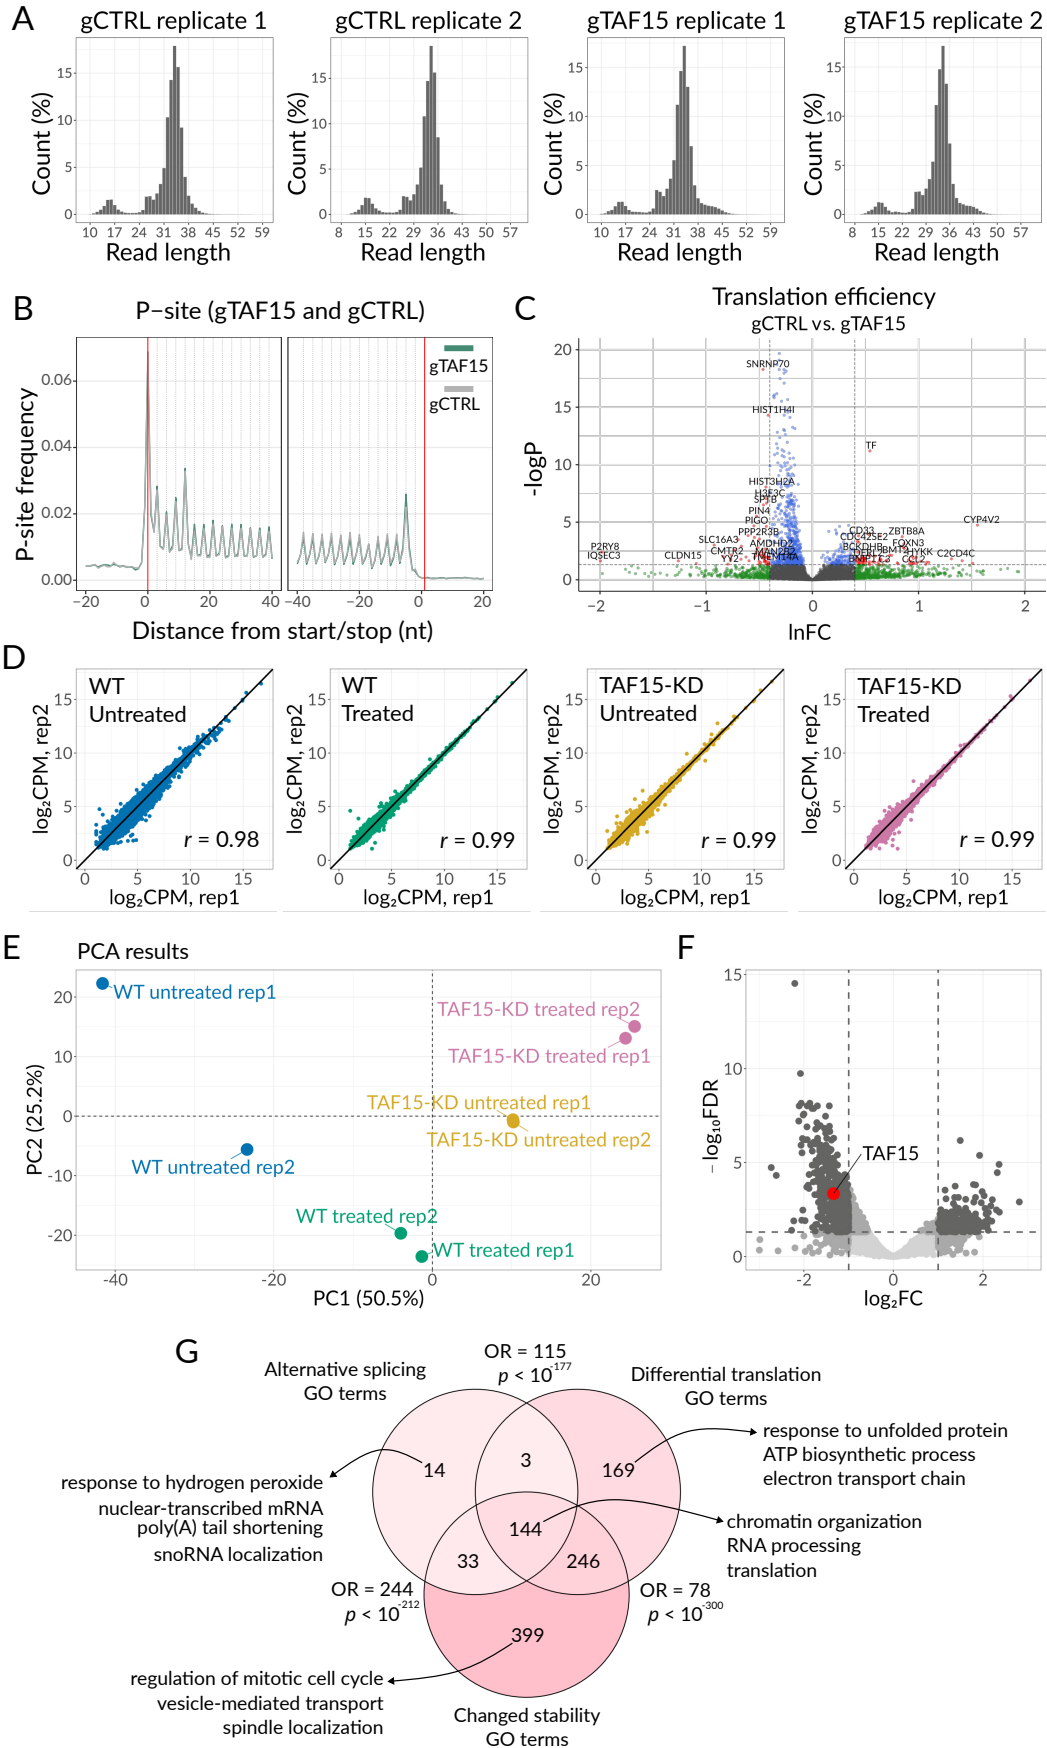



### Figure S8. TAF15 controls mRNA translation and stability

**(A)** Distribution of RPFs, aligned on an inferred ribosome P-site, on a metagene, centered around the translation start (left) or stop (right) site, for Ribo-seq of TAF15-KD and WT cells.

**(B)** Length distribution of ribosome protected footprints (RPFs) as determined by Ribo-seq.

**(C)** Volcano plot illustrating the changes in ribosome occupancy in TAF15-KD compared to control K562 cells, as determined by ribosome profiling analysis. The data points are colored according to thresholds in effect size ( $\ln FC \pm \ln 1.5$ ) and significance ( $p$ -adjusted  $< 0.05$ , t-test). The genes passing both significance filters are labeled.

**(D)** Scatter plots showing the correlations between biological replicates  $\log_2$ CPM for RNA-seq analysis of  $\alpha$ -amanitin treated and untreated WT and TAF15-KD cells. The different treatments and cell lines are shown in color.

**(E)** PCA analysis of RNA-seq samples for  $\alpha$ -amanitin treated and untreated WT and TAF15-KD cells. The first two principal components are shown. Analysis was performed using  $\log_2$ CPM values.

**(F)** Volcano plot showing genes differential stability upon  $\alpha$ -amanitin treatment, in TAF15-KD compared to control K562 cells. *TAF15* is highlighted red. The vertical dashed lines show  $\log_2$ FC thresholds of -1 and 1. The horizontal dashed line corresponds to FDR of 0.05. In total, there are 1015 genes passing  $|\log_2$ FC|  $> 1$  and FDR  $< 0.05$  (highlighted in dark gray).

**(G)** Venn diagram of TAF15 RNA regulons. Shown are the numbers of significantly enriched GO terms (FDR  $< 0.05$ ) for genes that exhibit significant changes in splicing, stability, or translation upon TAF15 knockdown, as captured by RNA-seq, Ribo-seq, and RNA-seq with  $\alpha$ -amanitin, respectively. Manually selected representative GO terms are shown for each part of the diagram. Results of one-sided fisher's exact test for each pairwise intersection are shown next to the corresponding area ( $p$ -value =  $2.93 \times 10^{-178}$  for differential translation and splicing intersection,  $1.78 \times 10^{-213}$  for differential stability and splicing, and less than  $10^{-300}$  for differential translation and stability).

Data used to generate this Figure are available in the Source Data File.

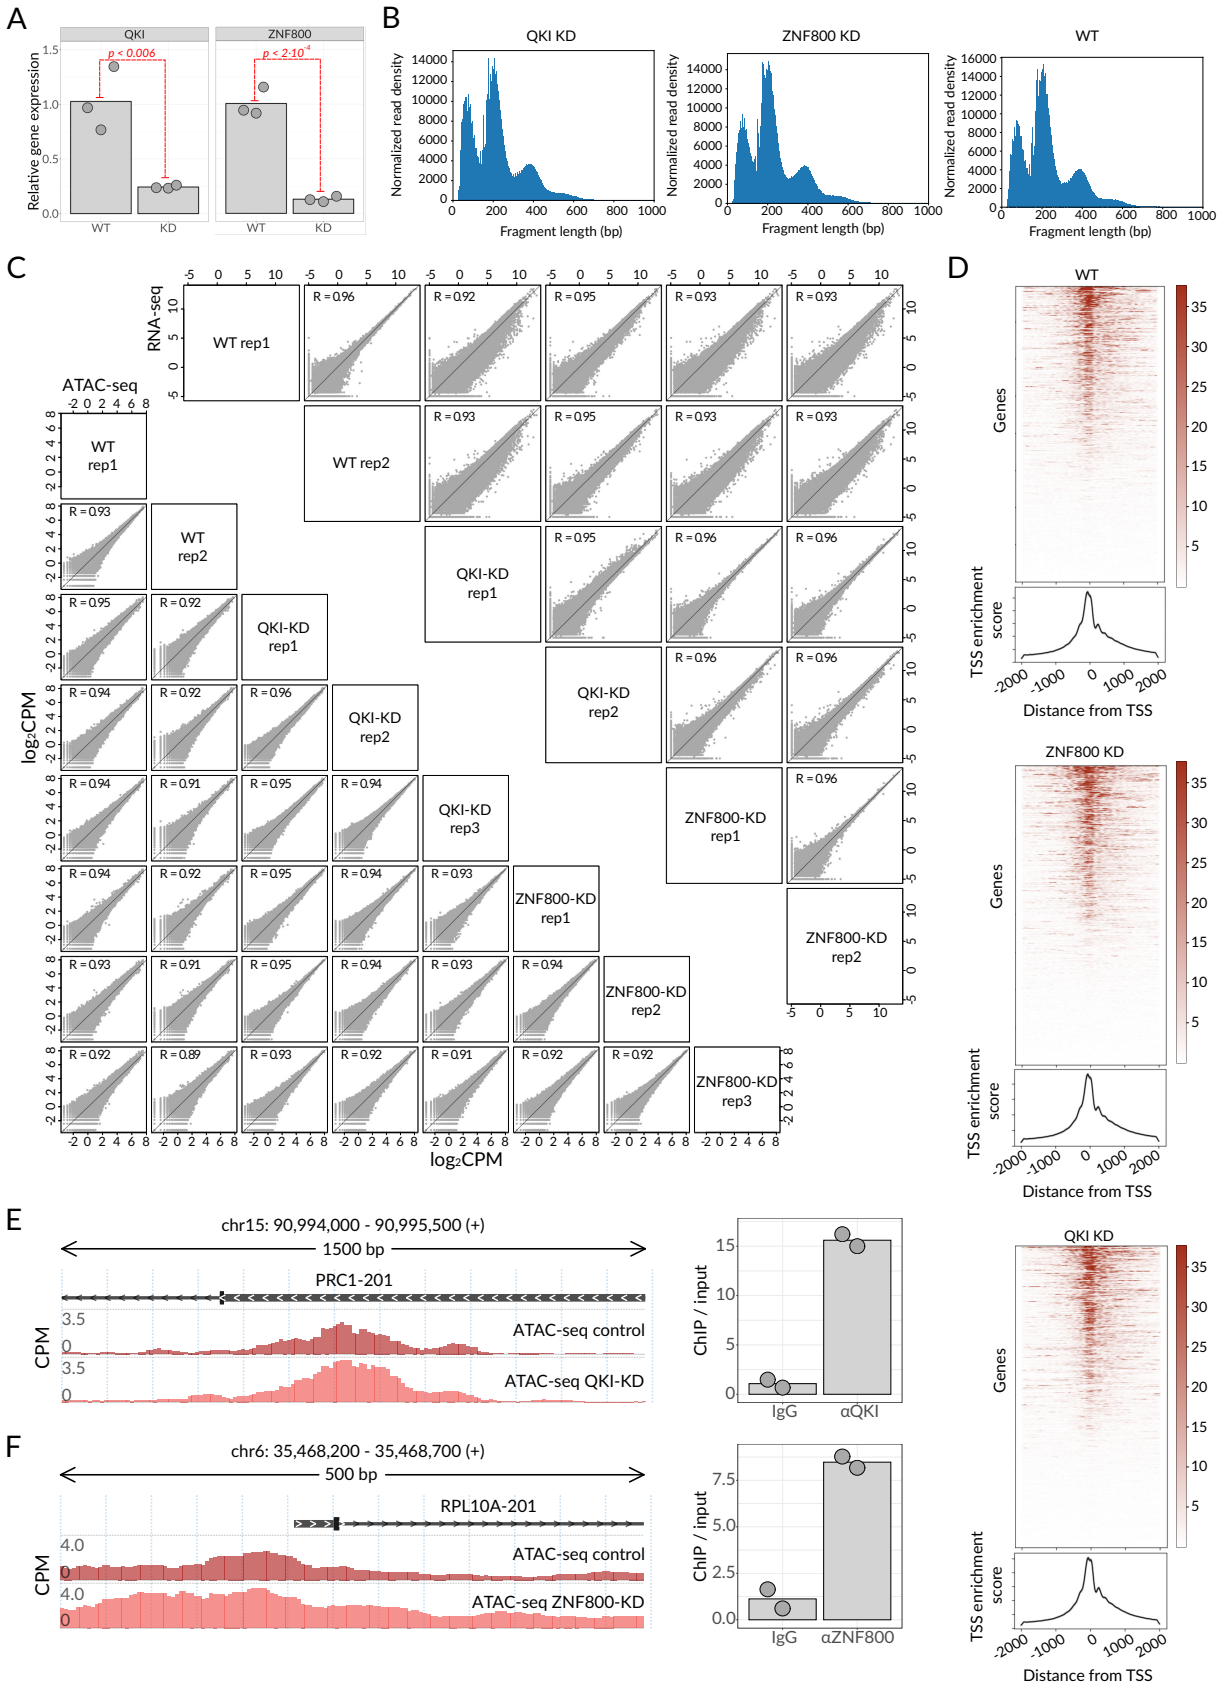

**Figure S9. ZNF800 and QKI control gene expression at transcriptional and post-transcriptional level**

**(A)** RT-qPCR quantification of relative levels of *QKI* and *ZNF800* transcripts in the respective knockdown cell lines. *P* from one-sided t-test performed on log-transformed expression estimates, 0.0052 for QKI-KD and  $1.18 \times 10^{-4}$  for ZNF800-KD.

**(B)** Histograms showing the fragment length distributions for ATAC-seq experiments for QKI-KD cells (left), ZNF800-KD cells (middle), and WT cells (right). A single exemplar replicate is shown per experiment.

**(C)** Scatter plots showing the correlations between biological replicates log2CPM for RNA-seq experiments (top) and ATAC-seq experiments (bottom).

**(D)** Enrichment of ATAC-seq reads near transcription start sites (TSS) is shown with heatmaps and Kernel Distribution Estimation (KDE) plots for WT cells (top), ZNF800-KD cells (middle), and QKI-KD cells (bottom). Heatmaps: rows correspond to genes; columns correspond to genomic positions relative to TSSs. Cell values show the number of ATAC-seq reads aligned to a given region. KDE plots show TSS enrichment scores across genes. A single exemplar replicate is shown per experiment.

**(E)** Left: genomic view of *PRC1* promoter region. ATAC-seq profiles of WT cells and QKI-KD cells are shown. Right: binding of QKI to the *PRC1* promoter region as measured by ChIP-qPCR in K562 cells.

**(F)** Left: genomic view of *RPL10A* promoter region. ATAC-seq profiles of WT cells and ZNF800-KD cells are shown. Right: binding of ZNF800 to the *RPL10A* promoter region as measured by ChIP-qPCR in K562 cells.

Data used to generate this Figure are available in the Source Data File.

**Supplementary References**

1. Szklarczyk, D. *et al.* STRING v11: protein–protein association networks with increased coverage, supporting functional discovery in genome-wide experimental datasets. *Nucleic Acids Res.* 47, D607–D613 (2018).
2. Youn, J.-Y. *et al.* High-Density Proximity Mapping Reveals the Subcellular Organization of mRNA-Associated Granules and Bodies. *Mol. Cell* 69, 517–532.e11 (2018).
